# Supplementary material for: Self-assembly route from a bis-aminal derivative to a new cyclam based macropentacycleElectronic supplementary information (ESI) available: 1H NMR spectrum of 2a and X-ray study of 3b, including views of the asymmetric unit, space-filling models and molecular packing. See http://www.rsc.org/suppdata/nj/b3/b310074j/
Source: Royal Society of Chemistry journal article supplement (doi:10.1039/b310074j), 2004-01-01
Supplement: b310074j.pdf [file b310074j.pdf]

## Self-Assembly Route from a Bis-aminal Derivative to a New Cyclam Based Macropentacycle

Raphaël Tripier, Stéphanie Develay, Michel Le Baccon, Françoise Chuburu, François Michaud and Henri Handel\*

*UMR CNRS 6521, "Chimie, Electrochimie Moléculaire et Analytique", Université de Bretagne Occidentale, B. P. 809, 6 avenue Le Gorgeu, 29285 Brest Cedex, France.*

*Fax: +33-(0)2/9801-6594. E-mail: [henri.handel@univ-brest.fr](mailto:henri.handel@univ-brest.fr)*

1.  $^1\text{H}$  NMR spectra of 2a ( $\text{D}_2\text{O}$ , 298K, 100 MHz)
2. X-ray structure of 3b : asymmetric unit.
3. Space Filling models for 3b and structure views with bromide atoms.
  - 3a. View along axis *a* (*b* horizontal right, *c* vertical up).
  - 3b. View along axis *b* (*c* vertical up, *a* horizontal left).
  - 3c. View along axis *c* (*a* horizontal right, *b* vertical up).
4. Molecular Packing showing the void occupied by disordered water molecules and bromide ions

**ATTACHED FILES :** Crystallographic data in CIF file and other electronic format

**1.  $^1\text{H}$  NMR spectra of 2a ( $\text{D}_2\text{O}$ , 298K, 100 MHz)**

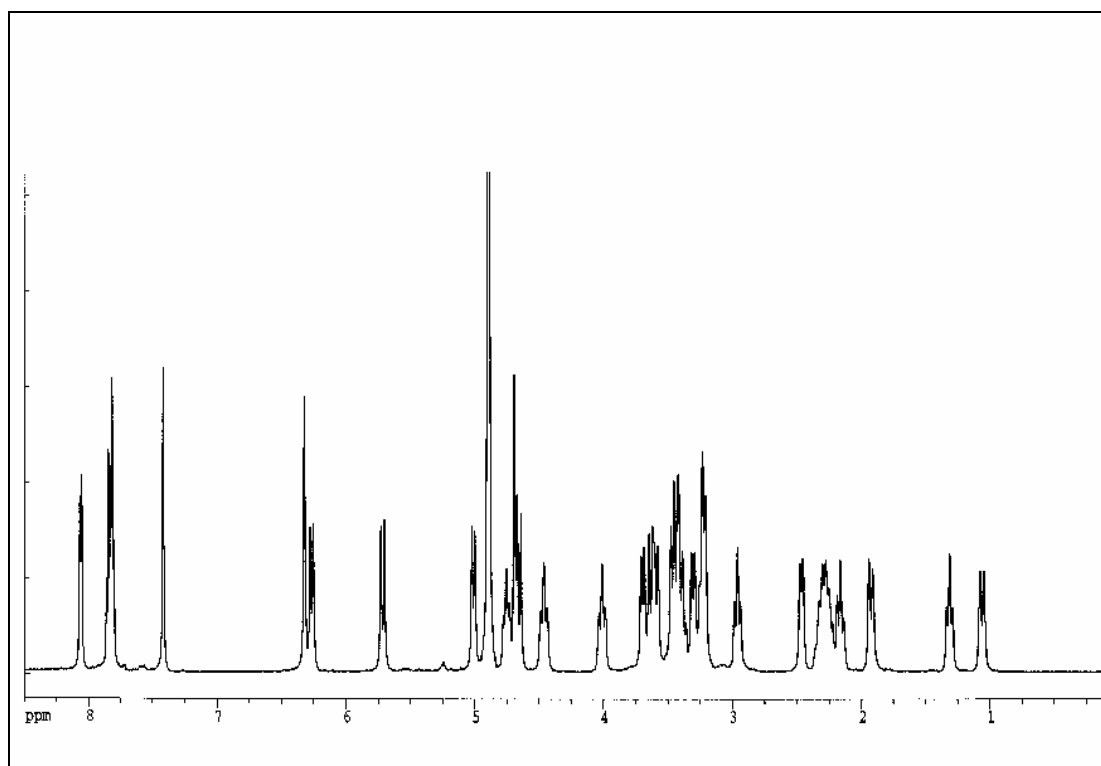

## 2. X-ray structure of 3b : asymmetric unit.

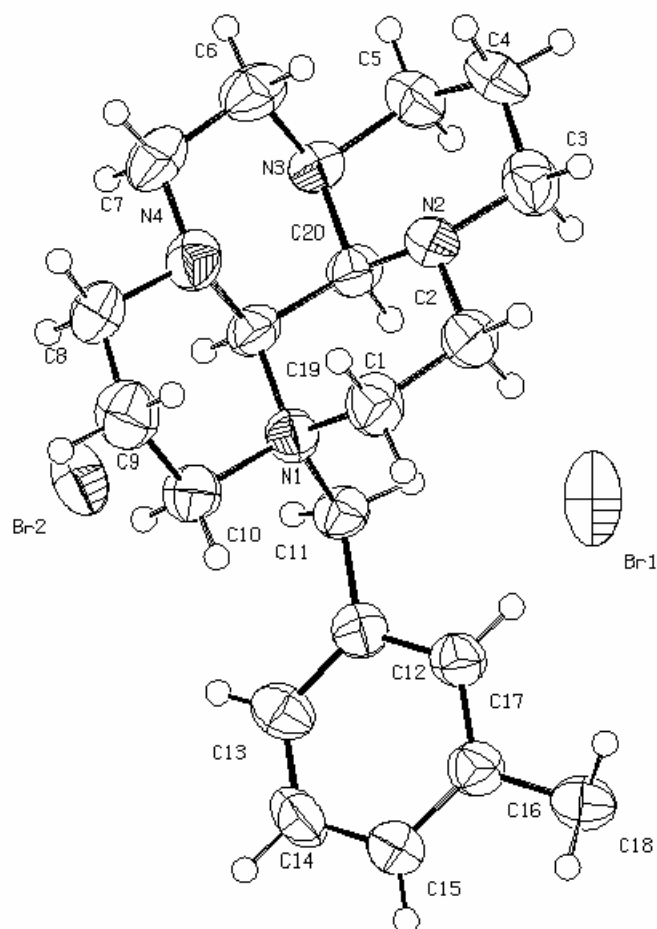

ORTEP drawing of asymmetric unit showing atom numbering viewed along ***b*** axis (***c*** points vertically up, ***a*** points horizontally left). Displacement ellipsoids are drawn at the 50% probability level. Br1 is on a centre  $-4$  (occupation factor  $\frac{1}{4}$ ). The expected 3 Br<sup>-</sup> anions with statistical occupation factor 0.25 are not represented.

**3. Space Filling models for 3b and structure views with bromide atoms.**

*3a. View along axis a (b horizontal right, c vertical up).*

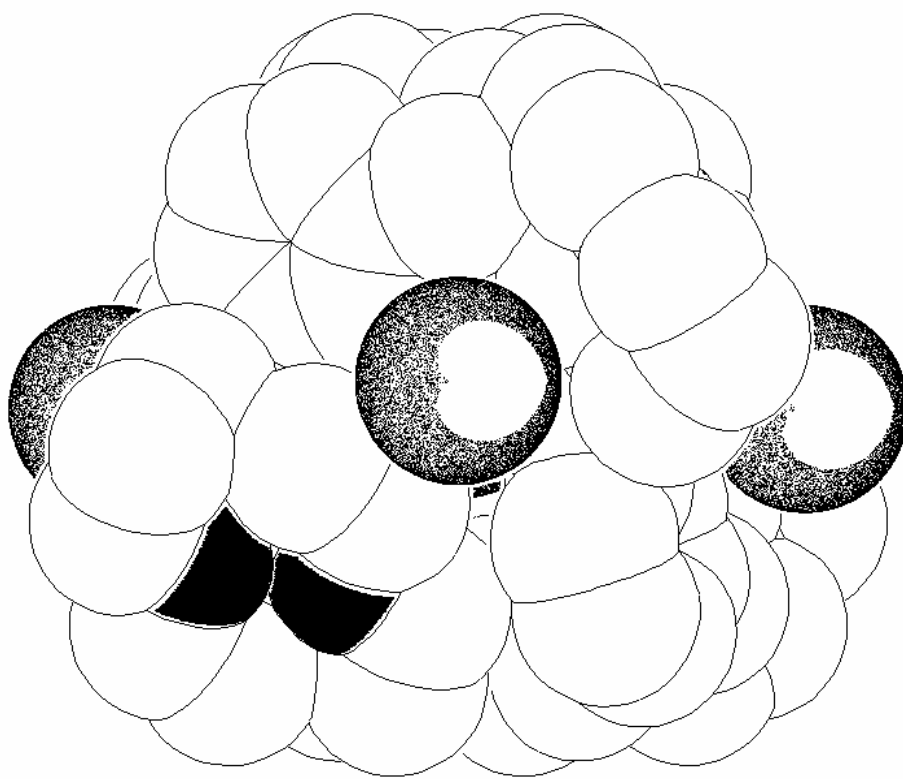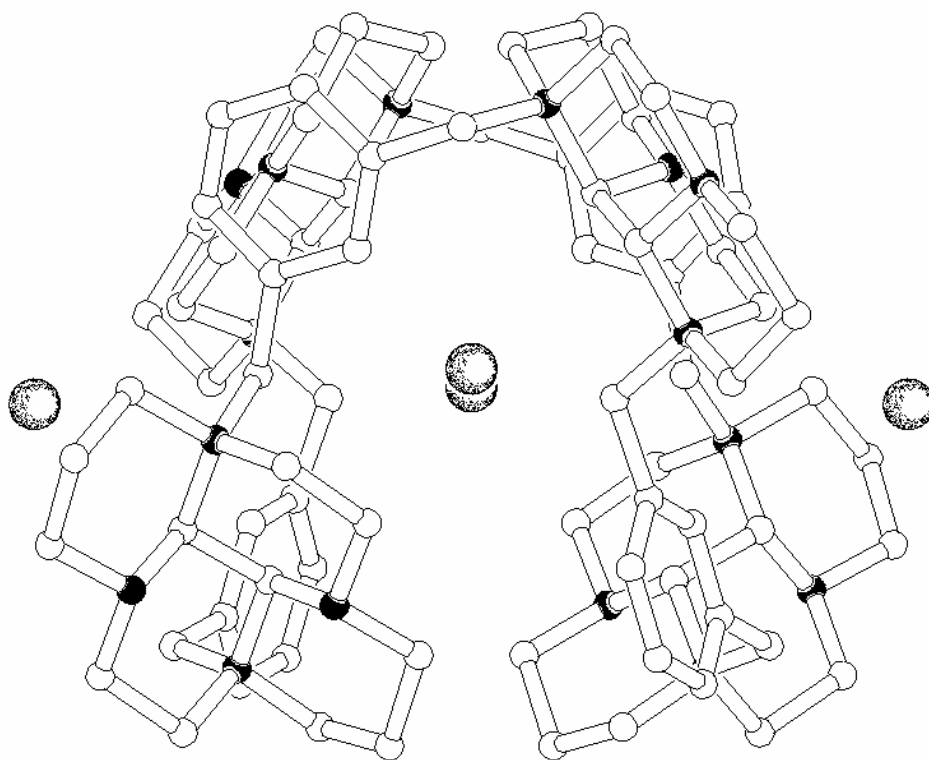

*3b. View along axis b (c vertical up, a horizontal left).*

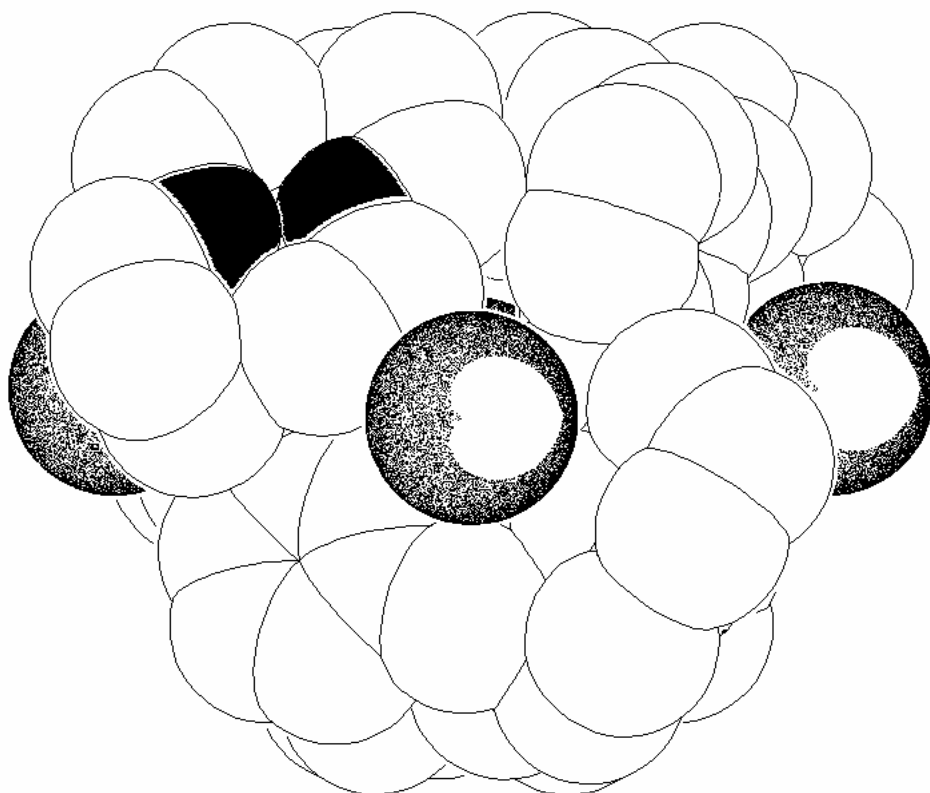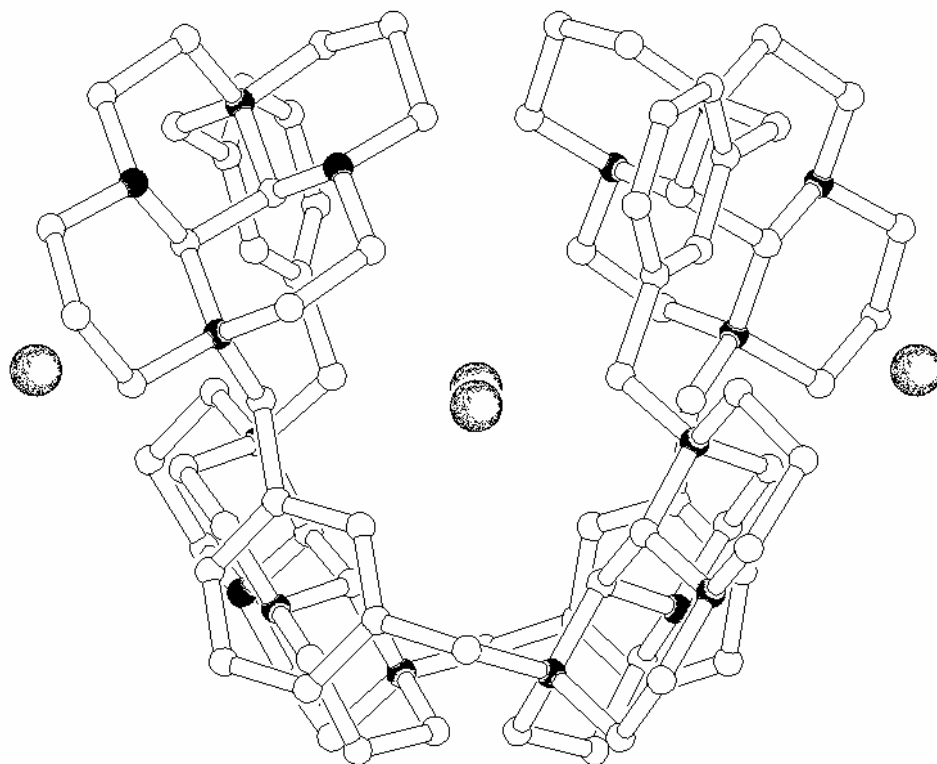

3c. View along axis *c* (*a* horizontal right, *b* vertical up).

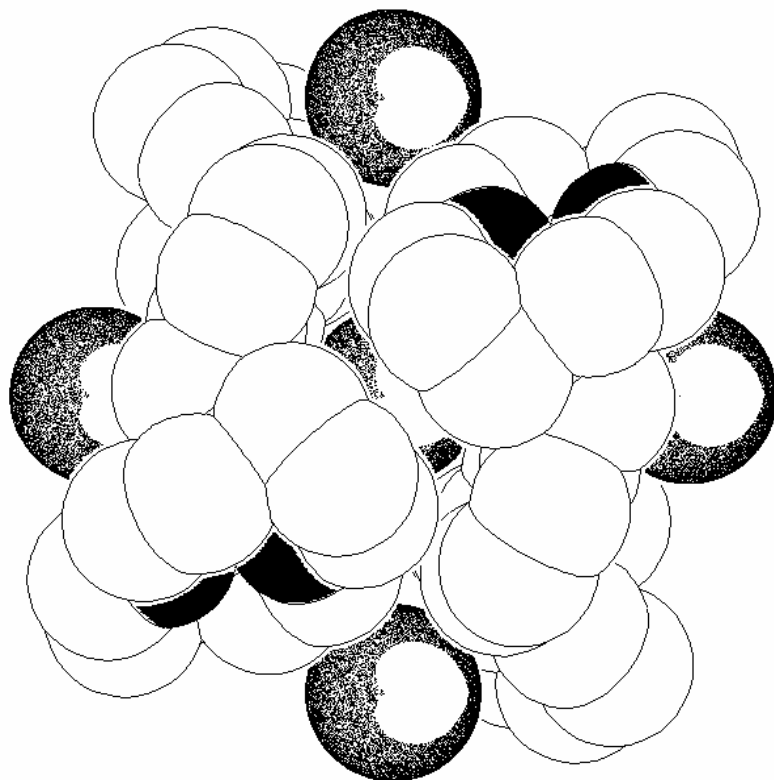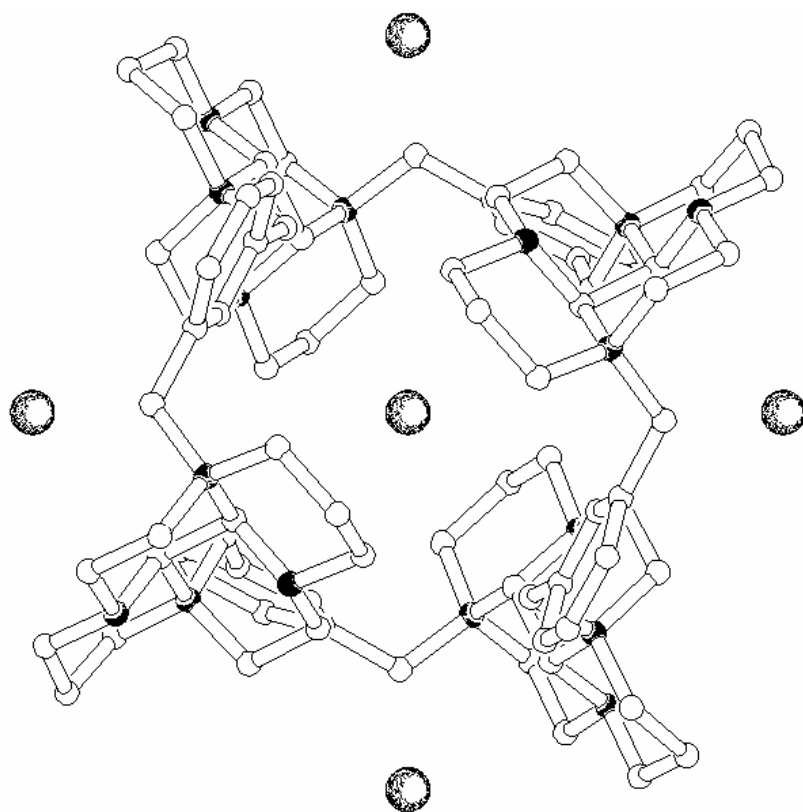

4. Molecular Packing showing the void occupied by disordered water molecules and bromide ions

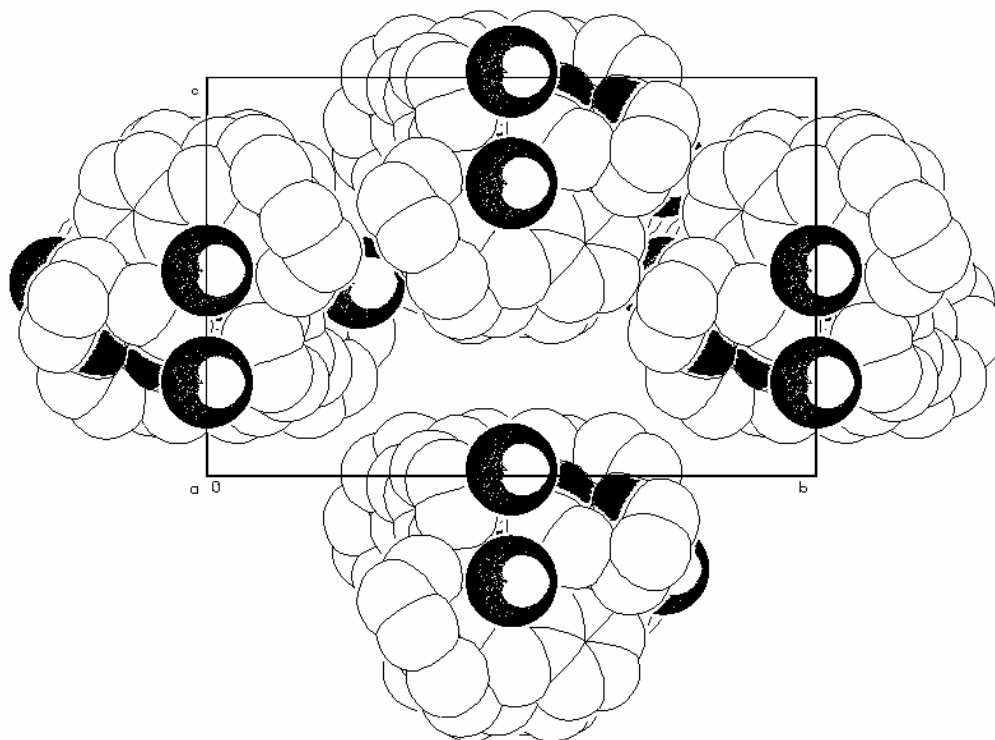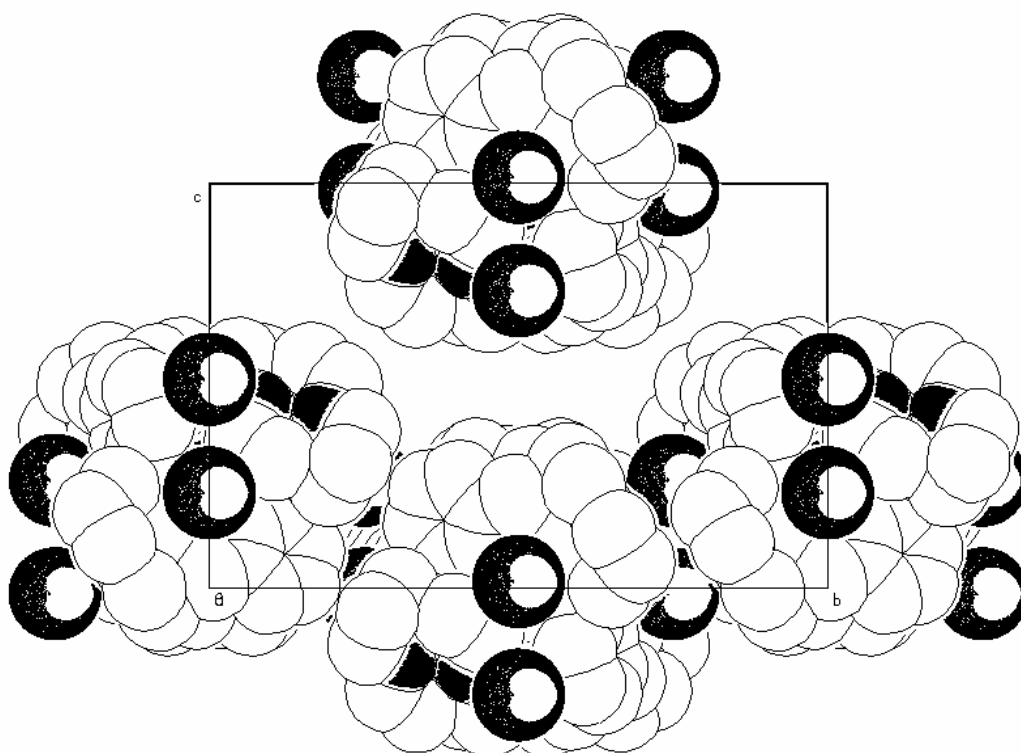

Up:  $x = 0$  ; down:  $x = 0,5$

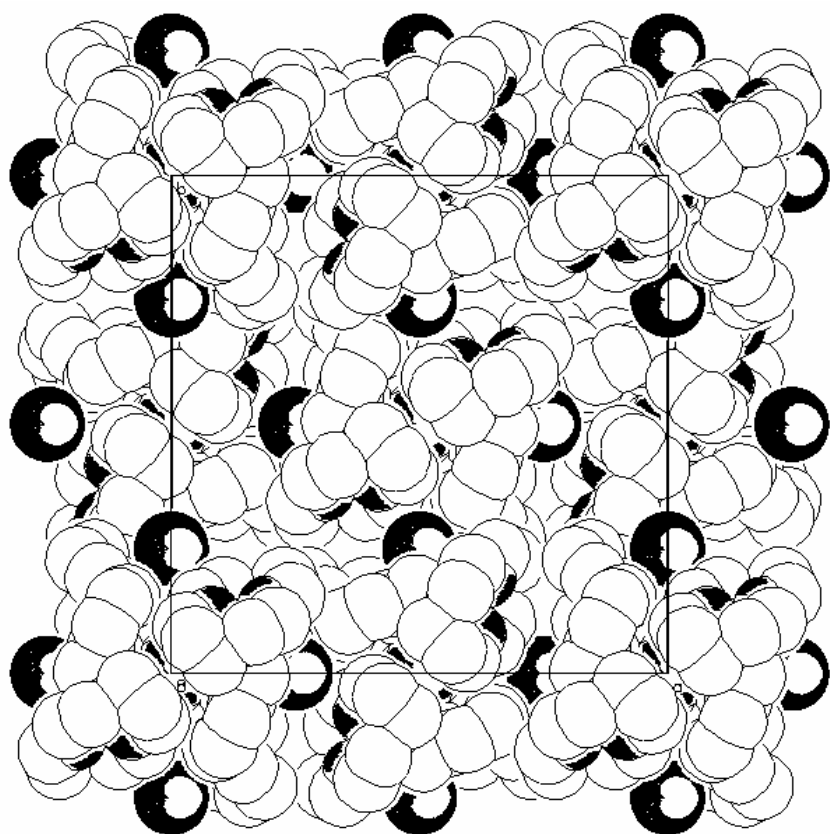

R0  $z = -0,5 ; 0,5$
